# Supplementary material for: Asexual reproduction of a few genotypes favored the invasion of the cereal aphid Rhopalosiphum padi in Chile
Source: PeerJ journal article supplement (doi:10.7717/peerj.7366), 2019-07-26

$$\text{DeltaK} = \text{mean}(|L''(K)|) / \text{sd}(L(K))$$

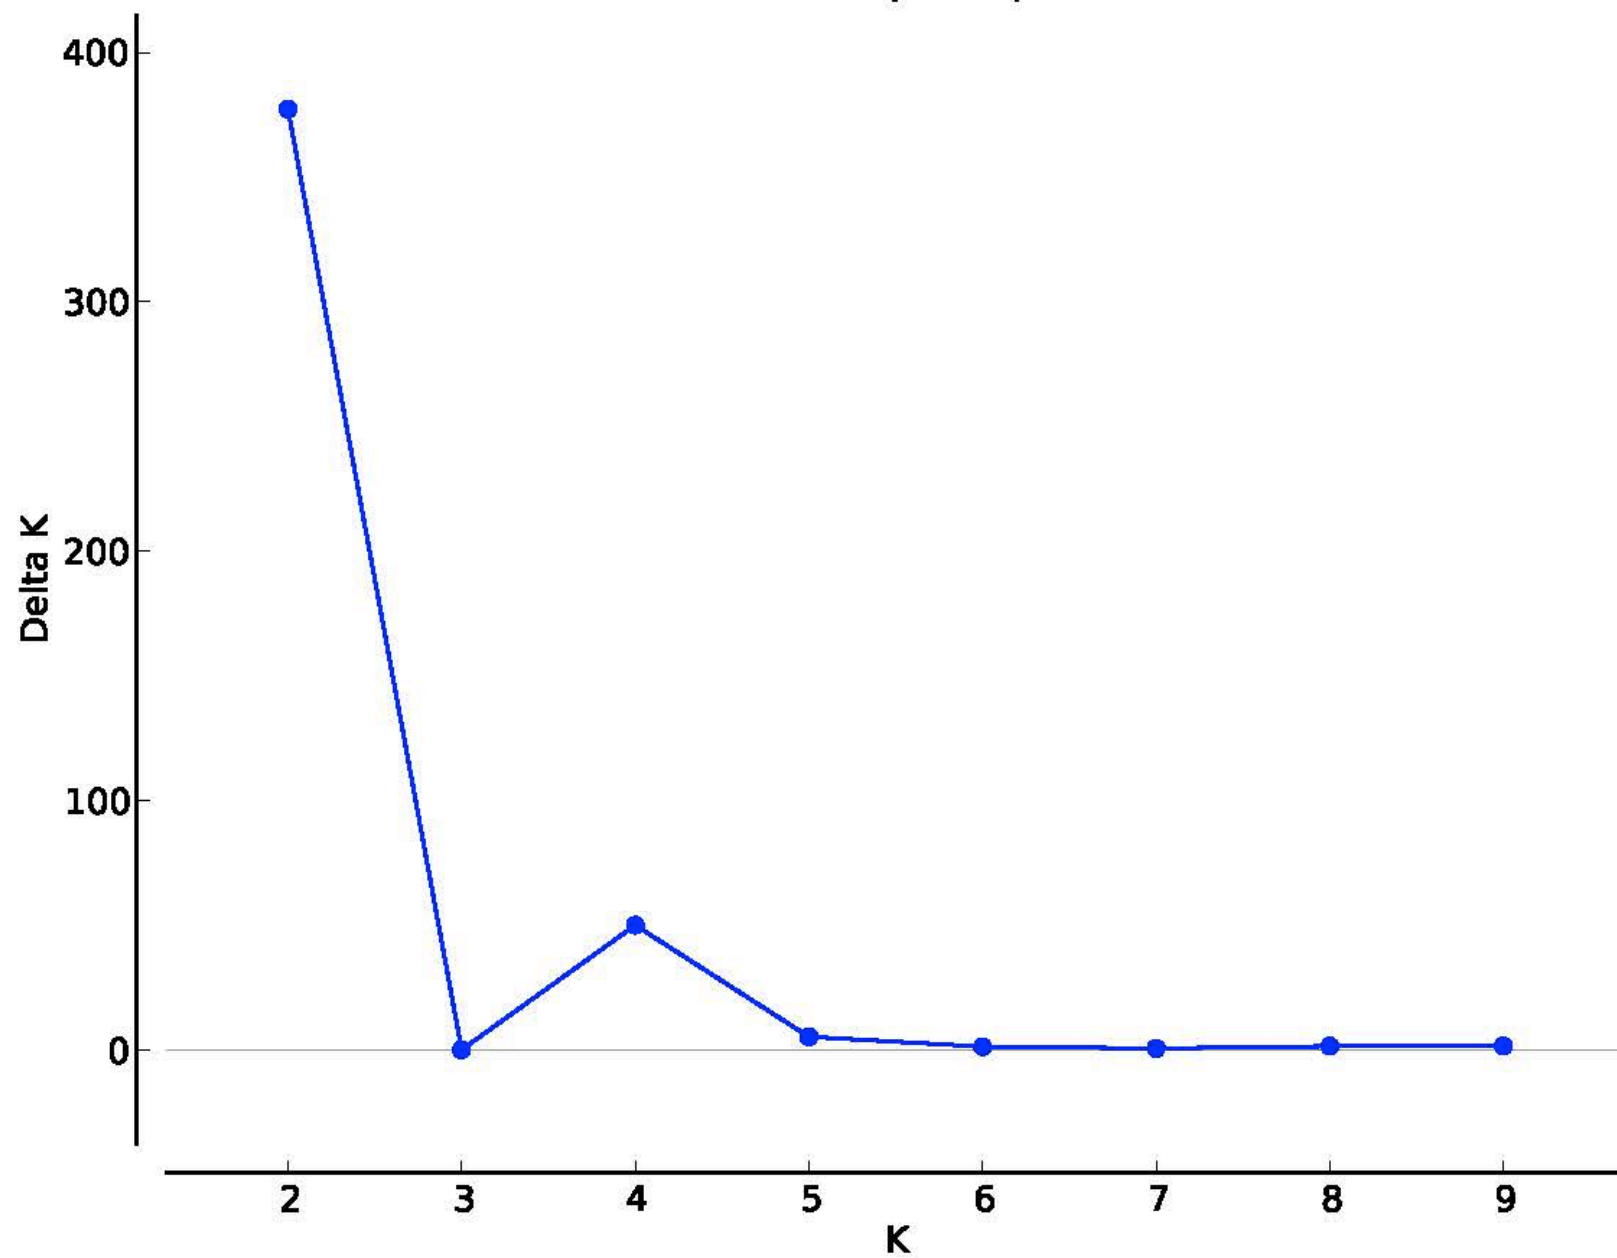

Supplement: FigS2.pdf [file FigS2.pdf]
